# Supplementary material for: The Banana Genome Hub
Source: Oxford University Press journal article supplement (doi:10.1093/database/bat035), 2013-01-01
Supplement: bat035_Supplementary_Data.zip [file bat035_Supplementary_Data.zip]

# Case Study of the Banana NCED Gene Family

## Table of contents

|                                                                                                                                                                                                       |           |
|-------------------------------------------------------------------------------------------------------------------------------------------------------------------------------------------------------|-----------|
| <b>1. Identification of the <i>Musa</i> NCED family .....</b>                                                                                                                                         | <b>2</b>  |
| 1.1. Search for a gene family .....                                                                                                                                                                   | 2         |
| 1.2. Search for a metabolic pathway .....                                                                                                                                                             | 8         |
| <b>2. Annotation of the <i>Musa</i> NCED genes with the GNPAnnot CAS .....</b>                                                                                                                        | <b>9</b>  |
| 2.1. Report NCED genes with the banana genome hub quick search .....                                                                                                                                  | 9         |
| 2.2. Show evidences for NCED genes with a genome browser .....                                                                                                                                        | 10        |
| 2.3. Similarity of banana NCED with <i>O. sativa</i> genome .....                                                                                                                                     | 11        |
| 2.4. Manual annotation of a NCED gene with a genome editor .....                                                                                                                                      | 12        |
| <b>3. Genomic comparative refinement .....</b>                                                                                                                                                        | <b>13</b> |
| 3.1. Phylogenetic analyses .....                                                                                                                                                                      | 13        |
| 3.2. <i>Musa</i> paralogous region analysis .....                                                                                                                                                     | 15        |
| 3.2.1. Matching ancestral blocks with an advanced search .....                                                                                                                                        | 15        |
| 3.2.1. Using ancestral blocks on a dotplot .....                                                                                                                                                      | 16        |
| 3.2.2. Checking back NCED gene contexts on the genome browser .....                                                                                                                                   | 16        |
| 3.2.3. SNP analysis .....                                                                                                                                                                             | 18        |
| <b>4. Query builder to export results .....</b>                                                                                                                                                       | <b>19</b> |
| <b>Figure 1: Search for NCED gene family (GreenPhylDB). ....</b>                                                                                                                                      | <b>2</b>  |
| <b>Figure 2: Structure of the carotenoid dioxygenase gene family (GP000379, CCD) and family composition of the 9-cis-epoxycarotenoid dioxygenase gene family (GP069973, NCED) (GreenPhylDB). ....</b> | <b>4</b>  |
| <b>Figure 3: Banana carotenoid dioxygenase gene family (GP000379, CCD) and phylogenomic analysis of the 9-cis-epoxycarotenoid dioxygenase (NCED) family (GreenPhylDB). ....</b>                       | <b>6</b>  |
| <b>Figure 4: Search enzymes in metabolic pathways (MusaCyc). ....</b>                                                                                                                                 | <b>8</b>  |
| <b>Figure 5: Banana Genome Hub Home and quick search for a gene (Tripal). ....</b>                                                                                                                    | <b>9</b>  |
| <b>Figure 6: The genome browser displays evidences for <i>Musa</i> gene structures (GBrowse). ....</b>                                                                                                | <b>10</b> |
| <b>Figure 7: Rice genome browser displays evidences for a co-ortholog of a banana NCED gene (GBrowse). ....</b>                                                                                       | <b>11</b> |
| <b>Figure 8: Editing a NCED <i>Musa</i> gene (Artemis). ....</b>                                                                                                                                      | <b>12</b> |
| <b>Figure 9: Dynamic phylogenetic analyses with Galaxy workflow manager. ....</b>                                                                                                                     | <b>13</b> |
| <b>Figure 10: Locate genes on ancestral blocks of <i>Musa</i> paralogous regions (Advanced Search). ....</b>                                                                                          | <b>15</b> |
| <b>Figure 11 Dot plot <i>Musa</i> beta ancestral blocks (PGDD). ....</b>                                                                                                                              | <b>16</b> |
| <b>Figure 12: Gene context of two <i>Musa</i> paralogous regions containing a NCED gene (GBrowse). ....</b>                                                                                           | <b>18</b> |
| <b>Figure 13: SNP analysis (SNIPlay). ....</b>                                                                                                                                                        | <b>18</b> |
| <b>Figure 14 Build a query (Biomart). ....</b>                                                                                                                                                        | <b>19</b> |

In this use case, we studied the evolutionary history of the 9-Cis-Epoxycarotenoid Dioxygenase (NCED) gene family of the *Musa acuminata* double-haploid Pahang proteome using several information systems available from the Banana Genome Hub. *M. acuminata* is a giant herb of the monocotyledon class.

To start with the Banana Genome Hub, go to <http://banana-genome.cirad.fr/>

## 1. Identification of the *Musa* NCED family

To identify the members of a gene family with the Banana Genome Hub several approaches are possible. In this example, we proposed a phylogenomic and a metabolic approach.

### 1.1. Search for a gene family

**Banana Genome Hub**

HOME | GENOME DETAILS | **TOOLS** | GBrowse | BLAST | DOWNLOAD | DOCUMENTATION

Gene families

Quick Search

IPR004294  
Full search  
☐ Perform deep search  
Search Clear  
(Advanced Search)

Choose the gene family tool on the Banana Genome Hub

Search for the IPR004294

| Families    |            | Sequences   |               |
|-------------|------------|-------------|---------------|
| Family ID   | no match   | Sequence ID | no match      |
| Family Name | no match   | UniProt     | no match      |
| Interpro    | 2 families | Annotation  | 6 sequences   |
| GO          | no match   | KEGG        | no match      |
|             |            | EC          | no match      |
|             |            | Interpro    | 332 sequences |
|             |            | GO          | 0 sequence    |

Click on the two families found

**Detailed results:**

Families found for IPR004294 : Carotenoid oxygenase

☒ Select all (2 families)

| Family Id                | Family Name                                  | Number of sequences | Status                               | Analyzes                            | % of sequences bearing IPR004294 |
|--------------------------|----------------------------------------------|---------------------|--------------------------------------|-------------------------------------|----------------------------------|
| <a href="#">GP000379</a> | carotenoid dioxygenase                       | 307                 | <span style="color: green;">●</span> | <input checked="" type="checkbox"/> | 97%                              |
| <a href="#">GP003862</a> | Carotenoid cleavage dioxygenase, ATCCD7 type | 32                  | <span style="color: green;">●</span> | <input checked="" type="checkbox"/> | 100%                             |

Note: sort multiple columns simultaneously by holding down the shift key and clicking other column headers.

Choose the carotenoid dioxygenase (CCD) family (GP000379)

**Legend:**

- Families (clustering)
  - Annotated gene families are underlined and gene family name pops up when you move your mouse cursor over.
  - Gene families are coloured in this color when the phylogenetic analyses are available.

**Figure 1: Search for NCED gene family (GreenPhyIDB).**

#### Method

The search for the Carotenoid oxygenase family was done with GreenPhyIDB (available through the Gene Families link of the TOOLS tab of the Banana Genome Hub Web Site Figure 1).

<http://banana-genome.cirad.fr/greenphy/>

Here, we searched for the family with the Interpro family identifier IPR004294 (Carotenoid oxygenase).

Then click to the GP000379 Family id to see its detail report (Figure 2).

#### Results

Two families were found (at the less stringent clustering level): carotenoid dioxygenase (GP000379, 307 sequences) and carotenoid cleavage dioxygenase (GP003862, 32 sequences).

The Gene family GP000379 has been curated (Family id is underlined) and annotated as 'carotenoid dioxygenase' (CD). Curation status gives a High/normal confidence level to this family. The Phylogenetic analyses were done (family id is blue). For more, see Figure 2 and Figure 3.

| Family Structure | Family Composition | Protein Domains | Protein List | Phylogenomic Analysis | Home |
|------------------|--------------------|-----------------|--------------|-----------------------|------|
|------------------|--------------------|-----------------|--------------|-----------------------|------|

  

| Clustering level | Family ID (number of sequences)                                                                         |
|------------------|---------------------------------------------------------------------------------------------------------|
| 1                | <b>GP000379</b> (307)                                                                                   |
| 2                | GP015570 (202) , GP017247 (71) , GP019999 (34)                                                          |
| 3                | GP040241 (202) , GP041864 (71) , GP044951 (34)                                                          |
| 4                | <b>GP069973</b> (152) , GP069979 (151) , GP069999 (148) , GP071338 (69) , GP072303 (46) , GP074574 (46) |

**Table 1:** This table displays which relationship has the selected family with other families in GreenPhyl cluster.

Advanced mode

**Legend:**

- Families (clustering)
  - Sequences are clustered and classified at 4 levels (from less to more stringent).
  - The number between parenthesis indicates the number of sequences in the cluster.
  - Selected family is highlighted like this.
  - Annotated gene families are underlined and gene family name pops up when you move your mouse cursor over.
  - Gene families are coloured in this color when the phylogenetic analyses are available.

**Figure 2: Structure of the carotenoid dioxygenase gene family (GP000379, CCD) and family composition of the 9-cis-epoxycarotenoid dioxygenase gene family (GP069973, NCED) (GreenPhylDB).**

#### Method

You can go to the family report from **Figure 1** or Quick search for the family ID GP000379, click on the Family ID until arrive on

[http://www.greenphyl.org/cgi-bin/family.cgi?p=id&family\\_id=379](http://www.greenphyl.org/cgi-bin/family.cgi?p=id&family_id=379)

[http://www.greenphyl.org/cgi-bin/family.cgi?p=id&family\\_id=69973](http://www.greenphyl.org/cgi-bin/family.cgi?p=id&family_id=69973)

#### Results

The Gene family GP069973 (subfamily at clustering level 4 in Family Structure tab of GP000379) has been annotated as 9-cis-epoxycarotenoid dioxygenase (152 sequences) but the phylogenetic analysis is not available (GP000379 family id is colored in green and not in blue). Experts decided to run the phylogenetic analyses at the Clustering level 1 for this family.

In the sequence number distribution among plant species complete proteomes, the *M. acuminata* one contains 10 NCED (see GP069973 Family Composition tab; Table 1).

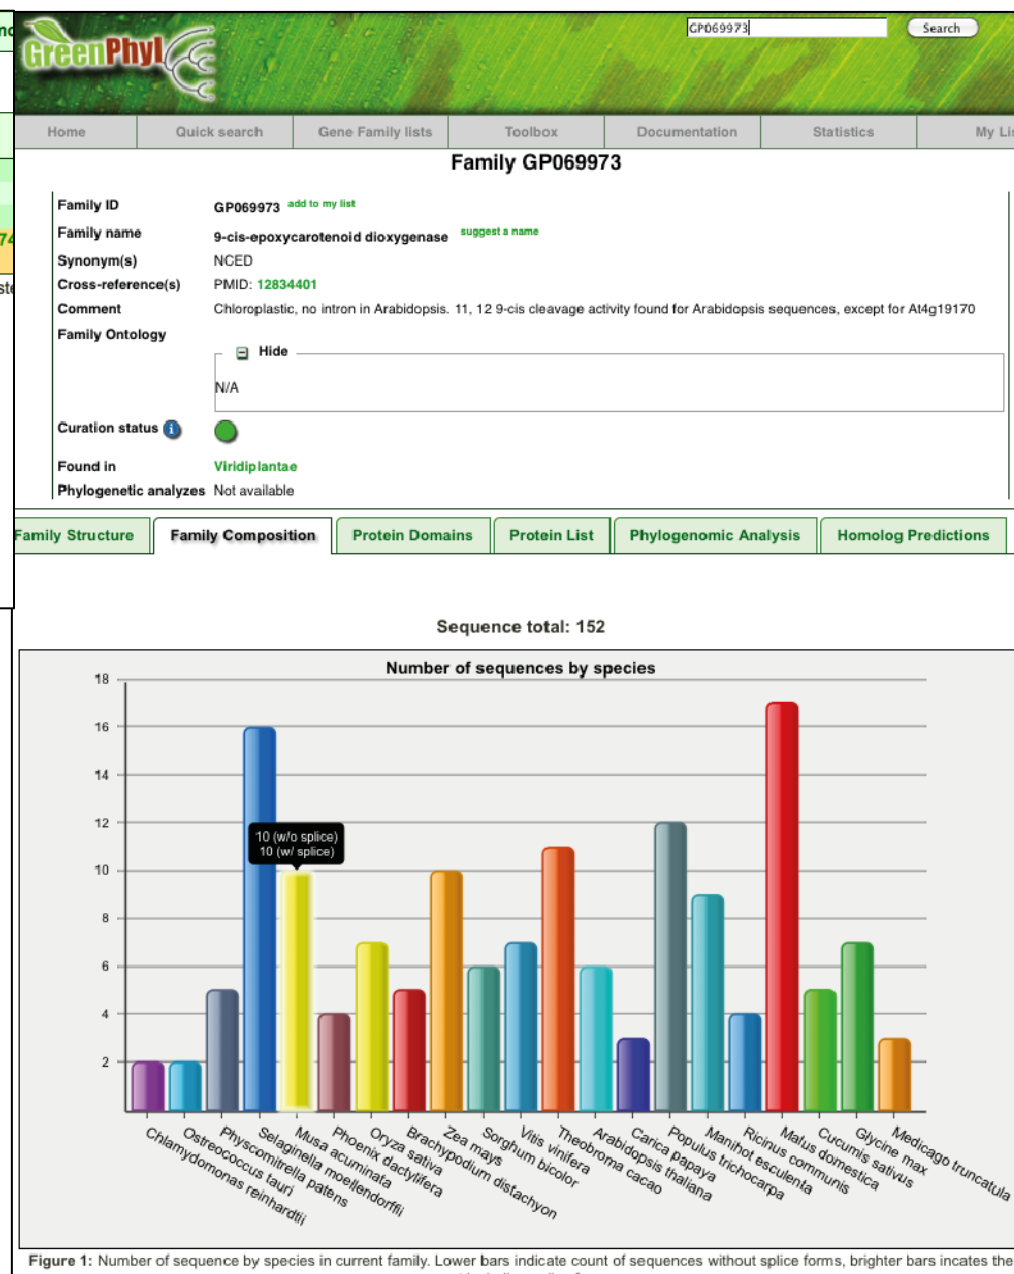

**Figure 1:** Number of sequence by species in current family. Lower bars indicate count of sequences without splice forms, brighter bars incates the

**Table 1: 10 *Musa* NCED belonging to the GP069973 family (GreenPhylDB)**

Method

This table was exported from

[http://www.greenphyl.org/cgi-bin/family.cgi?p=id&family\\_id=69973](http://www.greenphyl.org/cgi-bin/family.cgi?p=id&family_id=69973)

by clicking on family composition, then *Musa* bar, finally Excel link (Figure 2).

| Sequence ID           | InterPro  | Annotation                                                         |
|-----------------------|-----------|--------------------------------------------------------------------|
| GSMUA_Achr4T22870_001 | IPR004294 | 9-cis-epoxycarotenoid dioxygenase 1, chloroplastic                 |
| GSMUA_Achr5T02570_001 | IPR004294 | 9-cis-epoxycarotenoid dioxygenase 1, chloroplastic                 |
| GSMUA_Achr2T12950_001 | IPR004294 | 9-cis-epoxycarotenoid dioxygenase 1, chloroplastic                 |
| GSMUA_Achr4T19020_001 | IPR004294 | Putative Probable carotenoid cleavage dioxygenase 4, chloroplastic |
| GSMUA_Achr7T01250_001 | IPR004294 | 9-cis-epoxycarotenoid dioxygenase 1, chloroplastic                 |
| GSMUA_Achr8T12840_001 | IPR004294 | 9-cis-epoxycarotenoid dioxygenase 1, chloroplastic                 |
| GSMUA_Achr4T22880_001 |           | Hypothetical protein                                               |
| GSMUA_Achr5T15630_001 | IPR004294 | 9-cis-epoxycarotenoid dioxygenase 1, chloroplastic                 |
| GSMUA_Achr6T31180_001 | IPR004294 | NCED3                                                              |
| GSMUA_Achr4T31460_001 | IPR004294 | 9-cis-epoxycarotenoid dioxygenase 1, chloroplastic                 |

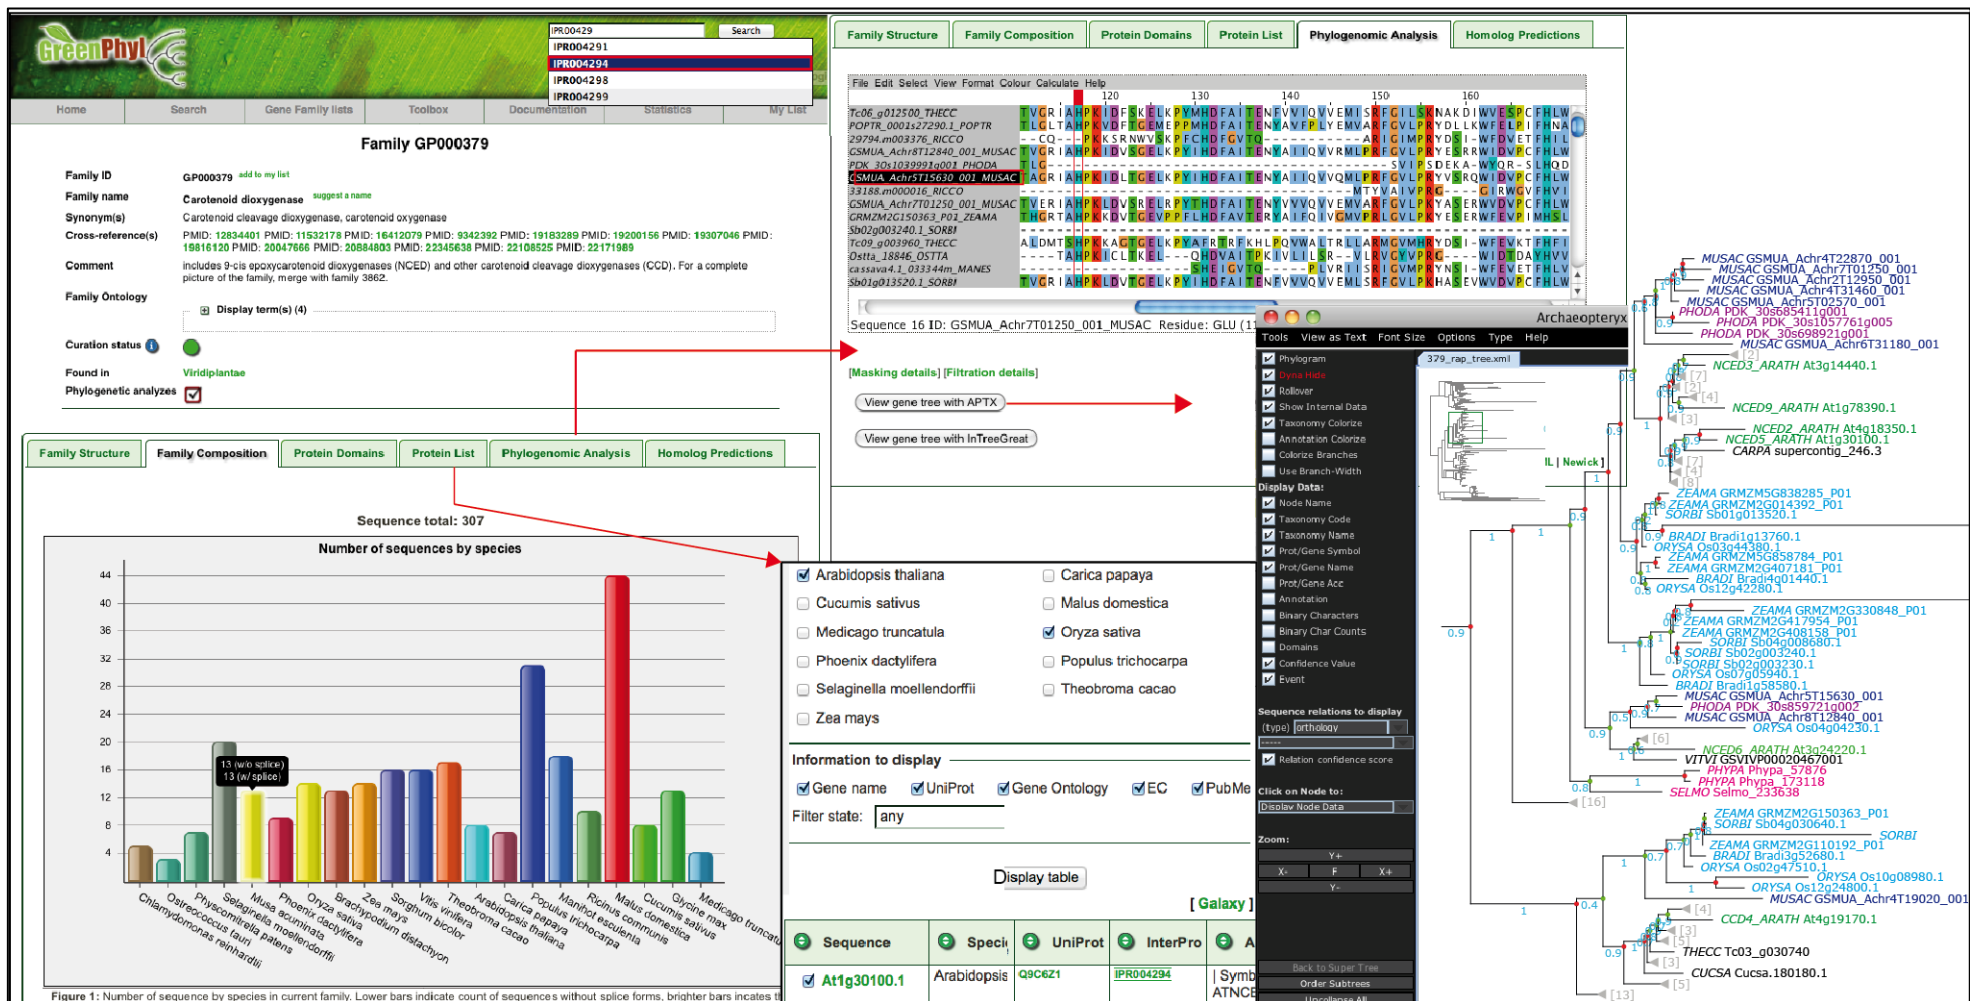

**Figure 3: Banana carotenoid dioxygenase gene family (GP000379, CCD) and phylogenomic analysis of the 9-cis-epoxycarotenoid dioxygenase (NCED) family (GreenPhylDB).**

## Method

You can go to the family report from **Figure 1** or Quick search for the family ID GP000379, click on the Family ID until reaching [http://www.greenphyl.org/cgi-bin/family.cgi?p=id&family\\_id=379](http://www.greenphyl.org/cgi-bin/family.cgi?p=id&family_id=379)

In the PhyML subtree, CCDs are in blue (Musaceae), cyan (Poaceae), purple (Areaceae), green (Arabidopsis), magenta (moss). Green dots represent speciation events whereas red dots are duplication events.

Data uploading to Galaxy workflow manager (Figure 9) can be made from the Protein List tab in GreenPhylDB, after the selection of species.

## Results

The DH-Pahang *Musa acuminata* proteome contains 13 CCD according to GreenPhylDB clustering (see GP000379 Family Composition tab). Histidine residues coordinating the catalytic iron, have been aligned and conserved in the pre-computed filtered multiple protein sequence alignment from MAFFT (see GP069973 Phylogenomic Analysis tab). In the PhyML pre-computed tree, viewed with the Archaeoptery Applet Java, available from the Phylogenomic Analysis tab, *Musa* polypeptides are separated into three groups containing dicotyledon CCD genes such as those of Arabidopsis (ARATH species code) suggesting duplications before the monocotyledons and dicotyledons divergence and whole genome duplications (WGD) specific to Zingiberales. We carried out the functional annotation to distinguish NCED from CCD enzymes using the *Arabidopsis thaliana* annotation provided by SwissProt, the reviewed section of the UniProt KnowledgeBase. The CCD family contains eight *Musa* NCED genes according (GSMUA\_Achr4T22870\_001, GSMUA\_Achr8T12840\_001, GSMUA\_Achr5T15630\_001, GSMUA\_Achr5T02570\_001, GSMUA\_Achr6T31180\_001, GSMUA\_Achr7T01250\_001, GSMUA\_Achr2T12950\_001, GSMUA\_Achr4T31460\_001) to Arabidopsis NCED annotation (NCED2, 3, 5, 6 and 9). GSMUA\_Achr4T22880\_001 was merged with GSMUA\_Achr4T22870\_001 during the manual curation process (see section 2). GSMUA\_Achr4G19020 classified in the NCED GreenPhylDB family but seem to be in fact a CCD gene as its *Arabidopsis* ortholog is CCD4.

## 1.2. Search for a metabolic pathway

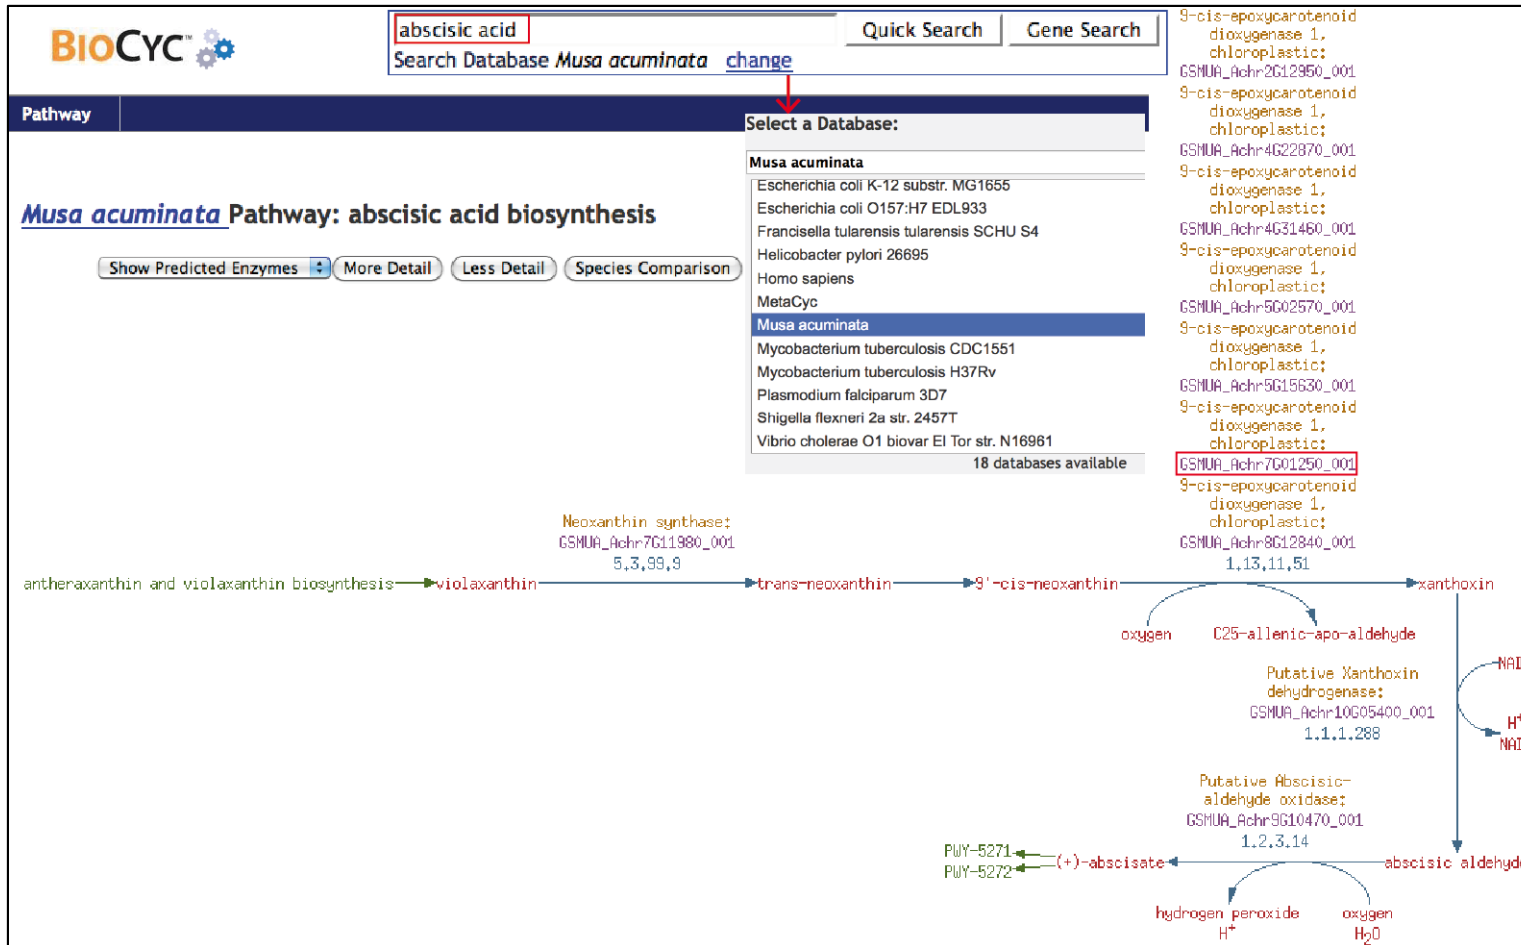

**Figure 4: Search enzymes in metabolic pathways (MusaCyc).**

## Method

Pathway Tools allowed to create the banana Pathway/Genome Databases (PGDB), MusaCyc (available through the Metabolic Pathway link of the TOOLS tab of the Banana Genome Hub).

<http://banana-genome.cirad.fr/musacyc>

## Results

NCED sequences were also searched with EC1.13.11.51 (9-cis-epoxycarotenoid dioxygenase in the abscisic acid biosynthesis) in MusaCyc (Pathway Tools). Seven *Musa* NCED were found and GSMUA\_Achr6G31180\_001 was missing compared to the gene family search described above.



## 2. Annotation of the Musa NCED genes with the GNPAnnot CAS

### 2.1. Report NCED genes with the banana genome hub quick search

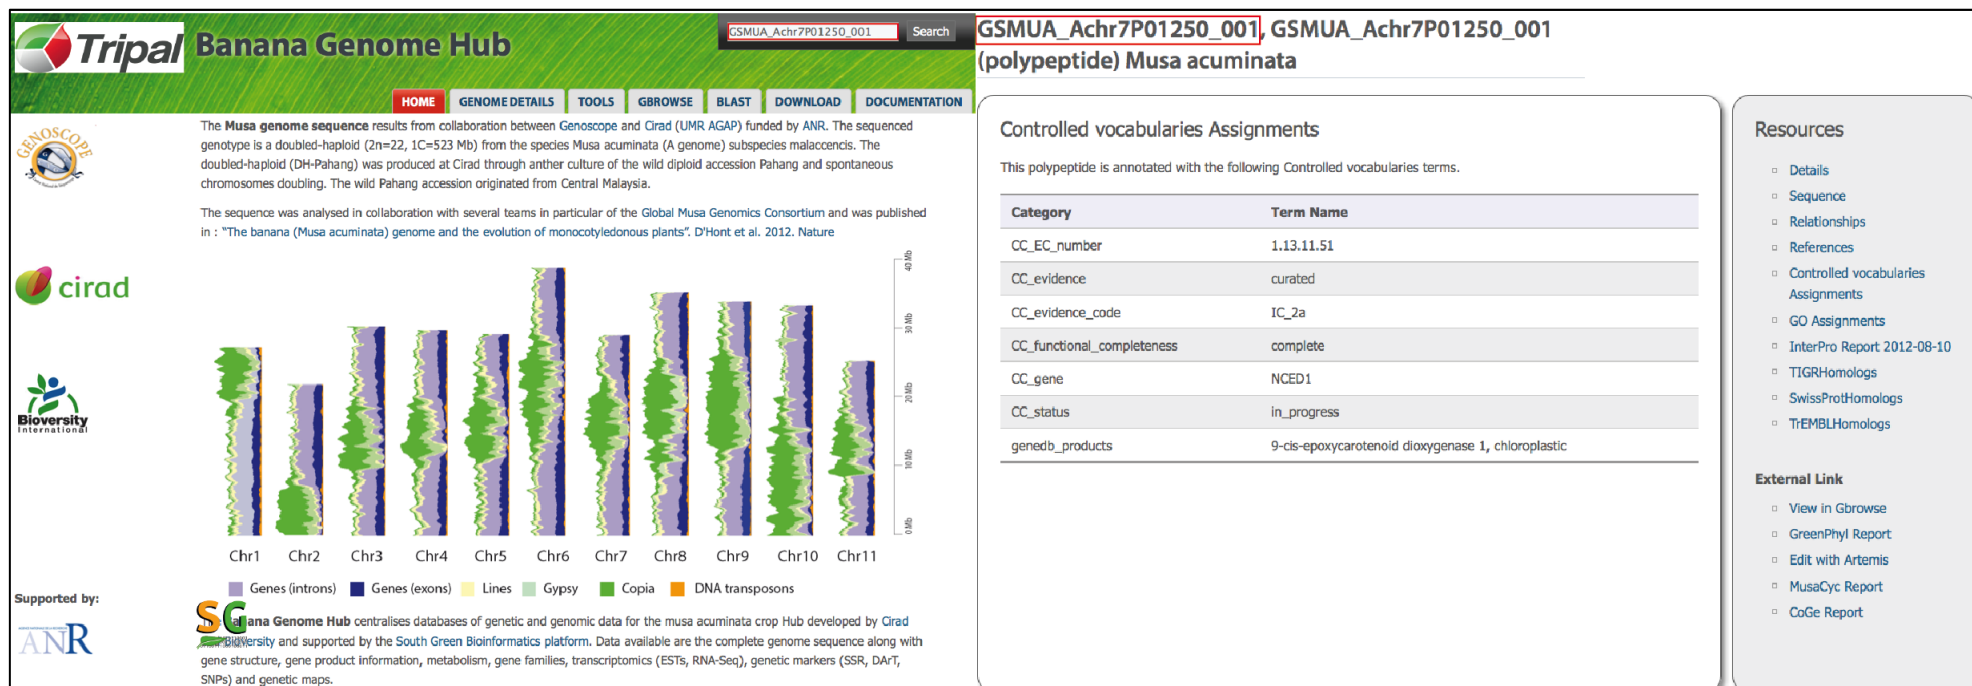

**Figure 5: Banana Genome Hub Home and quick search for a gene (Tripal).**

#### Method

Locus tags of a *Musa* NCED gene, such as GSMUA\_Achr5G02570\_001, were searched through the Tripal component of the GNPAnnot Community Annotation System (CAS) in order to access to its reports.

[http://banana-genome.cirad.fr/GSMUA\\_Achr7P01250\\_001](http://banana-genome.cirad.fr/GSMUA_Achr7P01250_001)

Tripal is the Web front end of the CAS allowing gene report but also the Banana Genome Hub allowing integration of several tools (e.g. feature search, sequence analyses, bio-information systems, data download, external links).

## 2.2. Show evidences for NCED genes with a genome browser

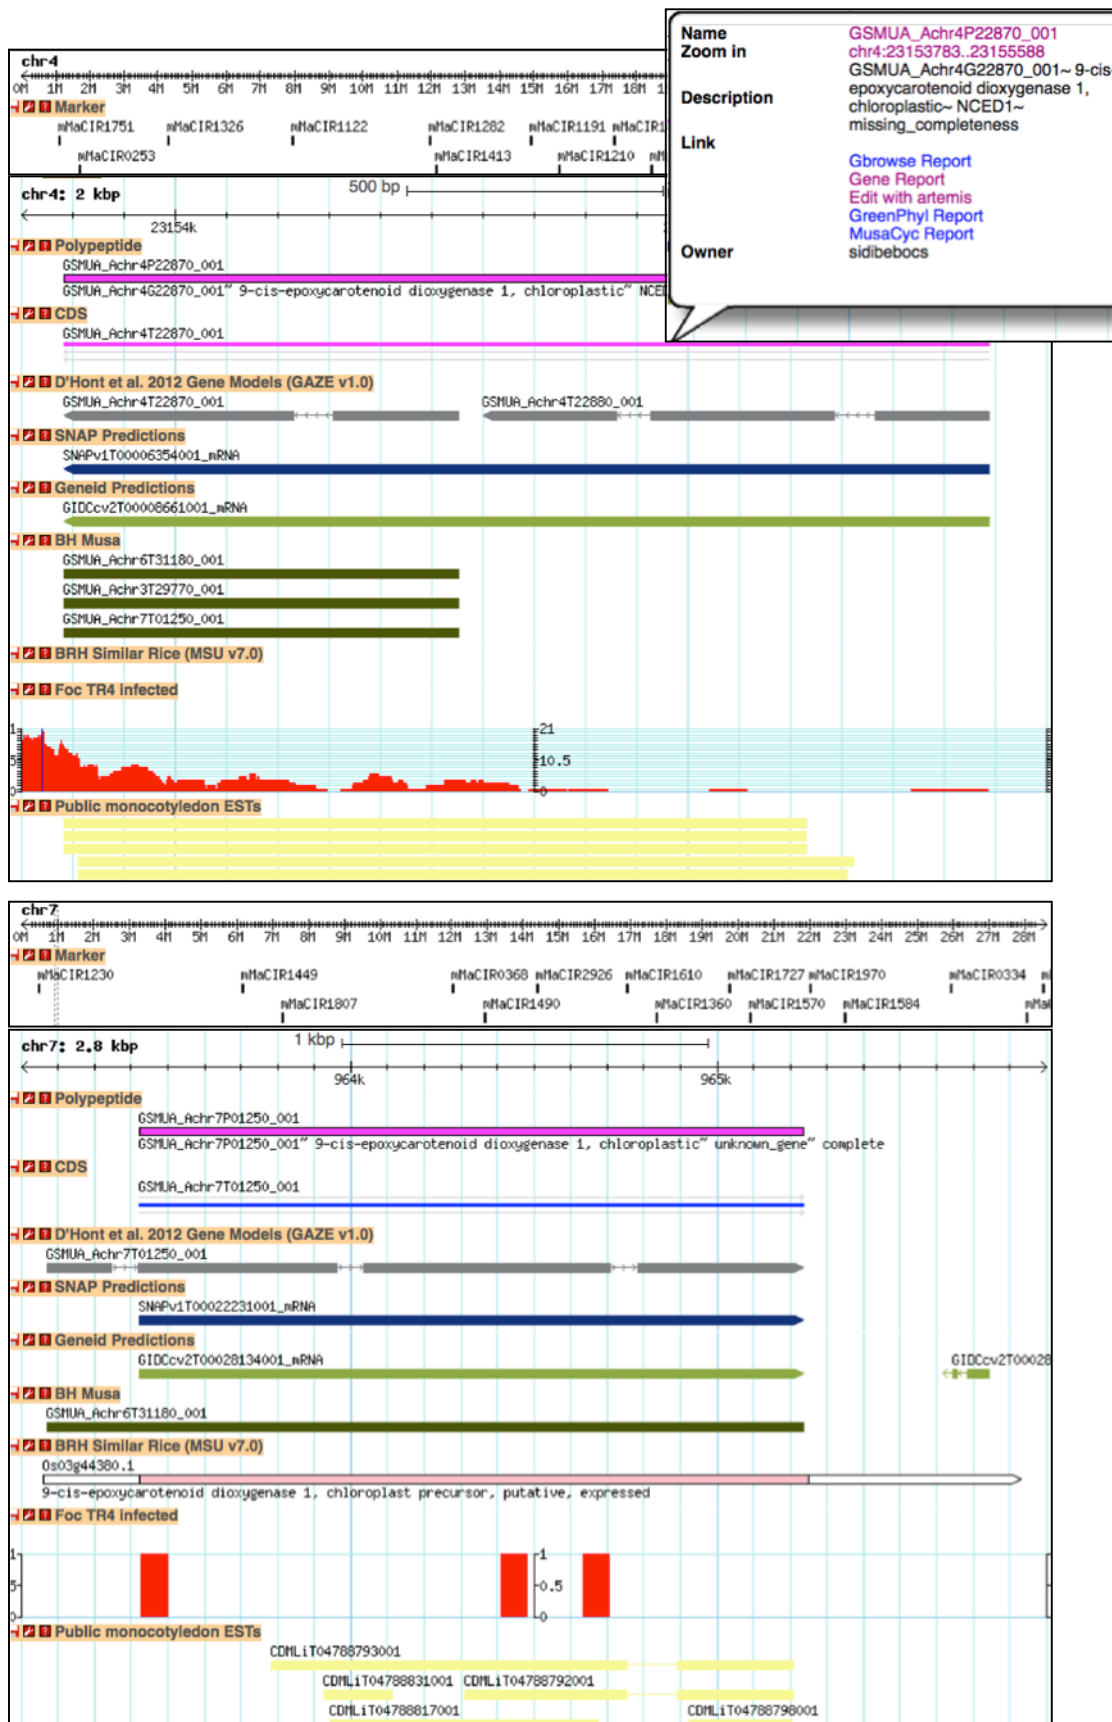

Figure 6: The genome browser displays evidences for *Musa* gene structures (GBrowse).

### Method

The banana genome browser is available through the GBrowse tab of the Banana Genome Hub.

[http://banana-genome.cirad.fr/cgi-bin/gbrowse/musa\\_acuminata/?name=chr7:963424..965235](http://banana-genome.cirad.fr/cgi-bin/gbrowse/musa_acuminata/?name=chr7:963424..965235)

The GMOD genome browser, GBrowse 2, displays evidences supporting a genomic feature and its genomic context. It can be queried by locus\_tag or by genomic location.

#### Results

The automatic GAZE prediction made by the Genoscope of GSMUA\_Achr7G01250\_001 was poly-exonic. This structure was not supported by any of the *ab initio* gene finders (*i.e.* Snap, Geneid) or extrinsic evidences (*e.g.* monocotyledon EST). Moreover two NCED gene fragments were predicted (GSMUA\_Achr4G22870\_001 and GSMUA\_Achr4G22880\_001) instead of one (extended GSMUA\_Achr4G22870\_001 after curation).

### 2.3. Similarity of banana NCED with *O. sativa* genome

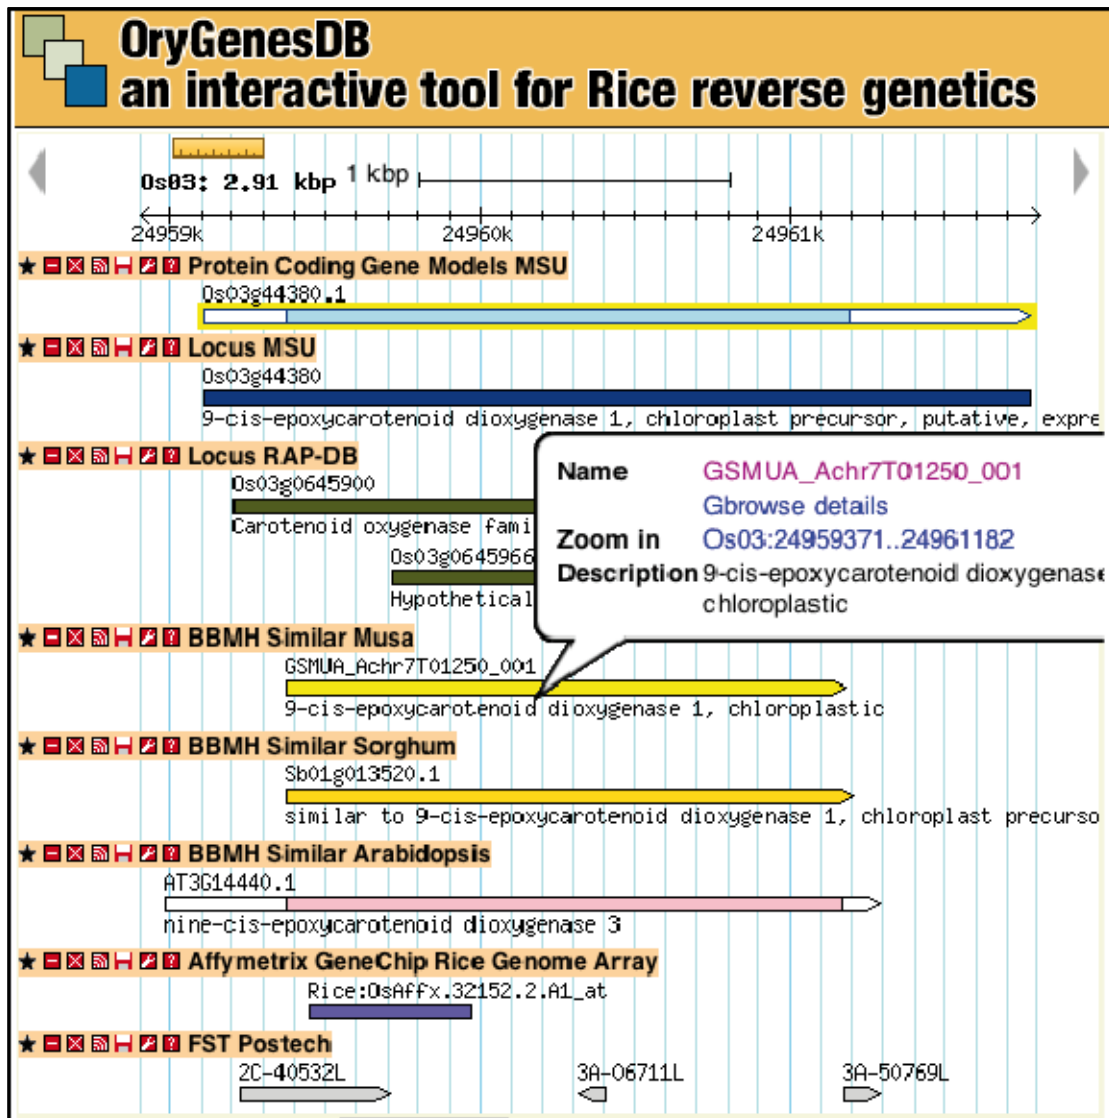

**Figure 7: Rice genome browser displays evidences for a co-ortholog of a banana NCED gene (GBrowse).**

#### Method

Rice genome is the model genome for the monocotyledon. One can browse in both directions between the DH-Pahang GBrowse and the OryGenesDB GBrowse. They are connected *via* URL that used the locus tag identifier as common identifier and links can be found in the popup balloons of GBrowse track Best Hits. So the OrygenesDB can also been entry point of the Banana Hub.

[http://orygenesdb.cirad.fr/cgi-bin/gbrowse/odb\\_japonica/?name=Os03g44380.1](http://orygenesdb.cirad.fr/cgi-bin/gbrowse/odb_japonica/?name=Os03g44380.1)

#### Results

The poly-exonic structure predicted by GAZE for the gene GSMUA\_Achr7G01250\_001 is not supported by its rice co-ortholog NCED3 Os03g44380 (MSU) found as intronless in OryGenesDB. We noted that Os03g44380 is present on Affimetrix GeneChip Rice Genome Array and a two T-DNA flanking sequence tag (FST) mutants exist that can help to better characterize the gene expression and polypeptide function if necessary.

## 2.4. Manual annotation of a NCED gene with a genome editor

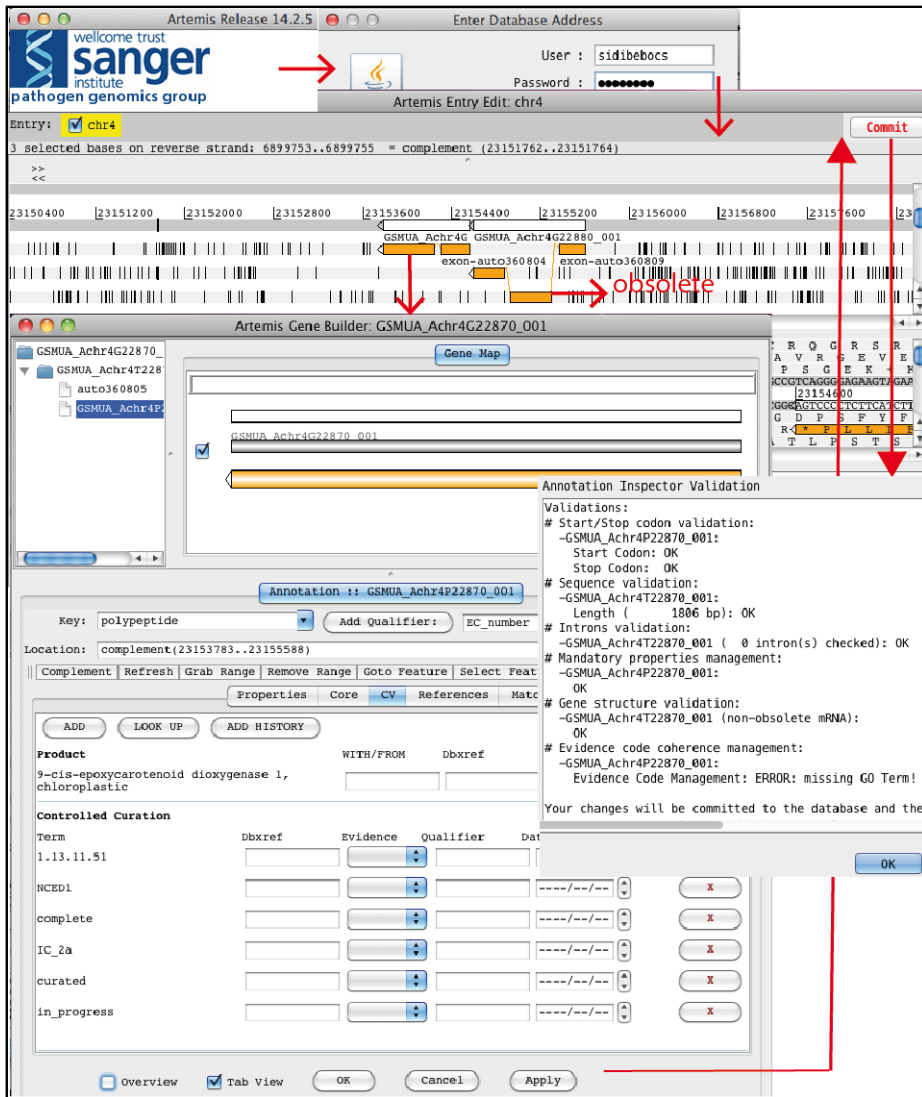

**Figure 8: Editing a NCED *Musa* gene (Artemis).**

### Method

Artemis annotation tool can be launched from Tripal gene page or via any GBrowse balloon.

<http://banana-genome.cirad.fr/cgi-bin/artemis.pl?species=musa;name=chr4:23128782..23180588>

If the file.jnlp does not download when clicking on this link then copy paste it in a Firefox browser for instance.

There is two ways to use the annotation tool: if you have an account, you can participate to the community annotation system by modifying features stored into the Chado Database. If you do not have an account, you can ask an account (see <http://banana-genome.cirad.fr/content/annotation-account-request> on the [http://banana-genome.cirad.fr/gene\\_annotation](http://banana-genome.cirad.fr/gene_annotation) accessible in the TOOLS tab of the Banana Genome Hub Web site) or connect to Artemis with a read-only account: banana\_read\_only without password and modifications can be saved on your local computer.

The inspector module of the Chado Controller checked manual annotation consistency. The advantage of working on a Chado database and not on flat files is that the annotations are managed via a Web information systems allowing sharing annotation, annotation backup and up to date homogeneous annotation. To have more information about how to annotate a gene structure, see the Protocols for gene annotation and the Chado Controller publication.

<http://banana-genome.cirad.fr/documentation>

<http://www.gnannot.org/biblio>

### Results

Both annotations, structural and functional, of GSMUA\_Achr4G22870\_001 were done with the Artemis genome editor. The coding exons were deleted except one which has been extended in order to restore the

mono-exonic structure. Most of the manual functional annotation consists in controlled vocabulary (e.g. qualifier gene symbol is NCED, product is 9-cis-epoxycarotenoid dioxygenase and EC\_number is 1.13.11.51).

### 3. Genomic comparative refinement

#### 3.1. Phylogenetic analyses

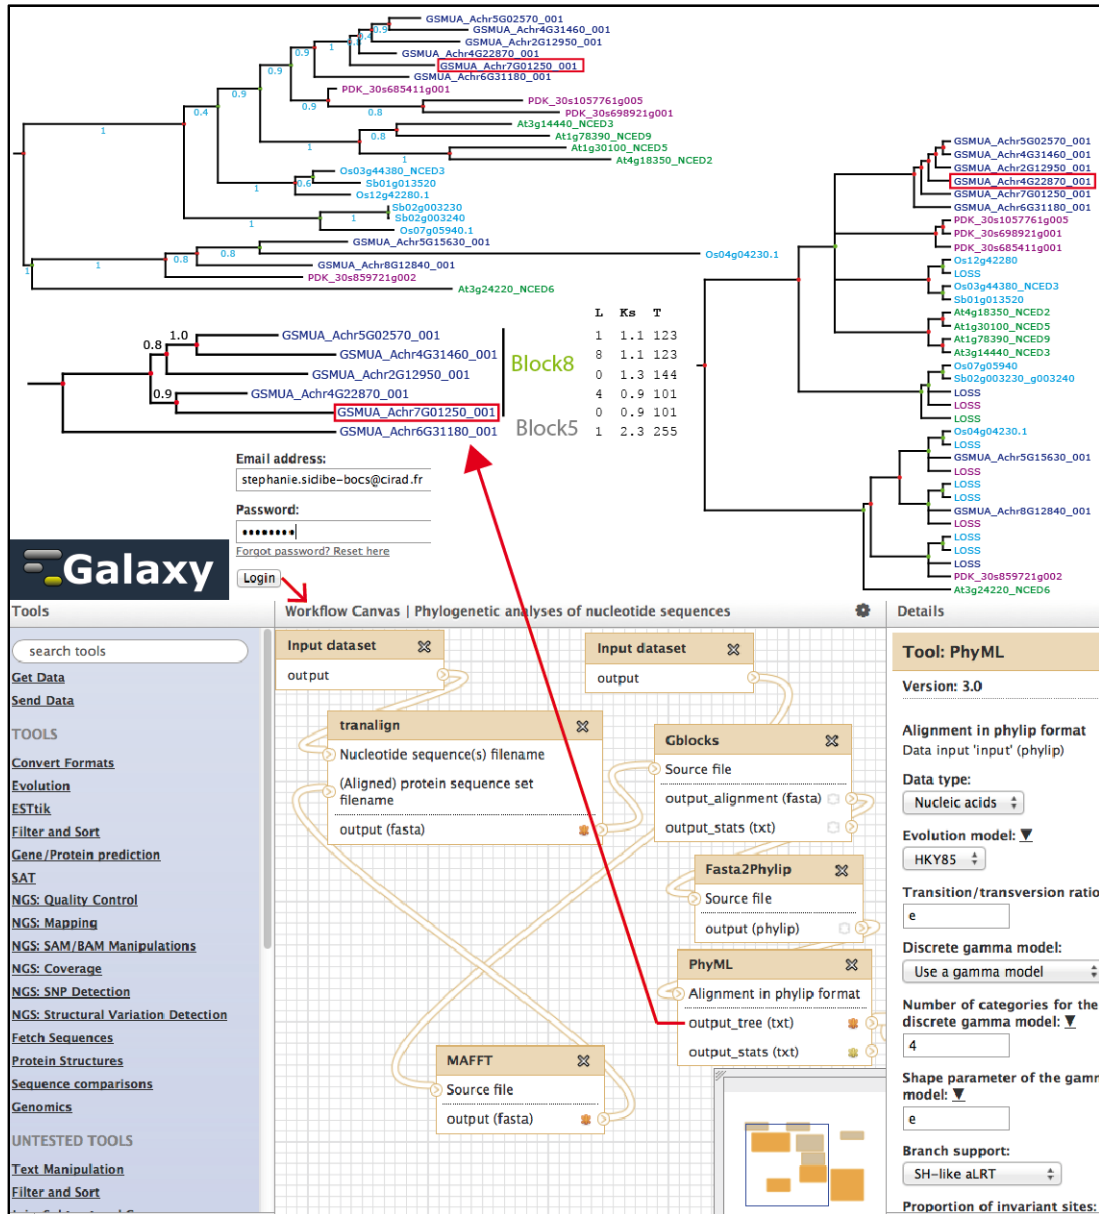

**Figure 9: Dynamic phylogenetic analyses with Galaxy workflow manager.**

#### Method

Galaxy workflow manager allows running easily complex sequence analyses.

<http://gohelle.cirad.fr/galaxy/>

Data uploading to Galaxy can be made from the Advanced Search tool of the Banana Genome Hub or from the Protein List tab in GreenPhyIDB, after choosing species (Figure 3). You can also upload our own data through the uploading tool of Galaxy. Once the data uploaded, they will appear in green on the right of the screen. They will be available with a number that can be used by a Galaxy tool. Even if you are not logged in, you can use the Galaxy tools accessible in the left panel of the screen.

For users who have an account, the workflows are available on the Workflows tab. For those who do not have one, the workflows will not be available, but the tools are still accessible. You can apply for a account in the computer center section of the SouthGreen Web site.

[http://gohelle.cirad.fr/cluster/compte\\_galaxy.php](http://gohelle.cirad.fr/cluster/compte_galaxy.php)

The workflows can be modified in the edit section of the workflow menu accessible by clicking on the arrow next to the workflow's name. The different steps are visible in the central part of the screen. The parameters can be modified for each step in the Details panel.

In order to refine automatic phylogenomic analysis, GreenPhyl Phylogenomic analysis workflow (MAFFT with default iterative refinement method, and PhyML using LG+I $\Gamma$  model and providing aLRT+SH-like branch supports) was performed on a subset of NCED genes (banana, rice, sorghum, date palm, *Arabidopsis*). For the correct execution of the last step, tree reconciliation, of both workflows, the header of the plant NCED polypeptide fasta sequences of the input file should be correctly formatted with the five letter species code (e.g. GSMUA\_Achr5G15630\_001\_MUSAC) and the species tree has to be in PhyloXML format. The resulting Newick and PhyloXML gene trees can be viewed using Archeopterix tree viewer. The gene tree topology was further analyzed in the light of the DH-Pahang *Musa* Ks and expression data. L reports the number of mapped reads per kilobase of CDS per million mapped reads (RPKM).

### Results

The GreenPhylDB phylogenetic analyses were further completed using the Galaxy GreenPhyl-like workflow with the height corrected DH-Pahang polypeptide sequences and homologous sequences from the rice, sorghum, date palm and *Arabidopsis* genomes (selected from GreenPhylDB). Based on the reconciled gene trees (RAPGreen), we tried to reconstruct the evolutionary history of the DH-Pahang NCED family. We expected to observe *Musa* genes as an outlier clade of *Poaceae* genes with a speciation node between monocotyledon and dicotyledon. Among the eighth *Musa* NCED, Six genes clustered together in the vicinity of the group represented by [AtNCED2, 5, 3 and 9] and two genes (GSMUA\_Achr8G12840 and GSMUA\_Achr5G15630) were localized in the same group as AtNCED6.

In both GreenPhylDB (Figure 3) and Galaxy (this figure), two duplications prior to the divergence of monocots and dicots were visible: one with two *Musa* NCED members (the most ancestral), one with only *Poaceae* members and with the six *Musa* members.

Differences were also observed between the GreenPhylDB and Galaxy results. We first looked at the multiple alignments and the cleaned alignment obtained with Galaxy was longer than in the GreenPhylDB (499 aa vs 283 aa). This can be explained by the fact that it was based only on five species (banana, date palm, rice, sorghum and *Arabidopsis*), in contrast compared to the 22 taxa included in GreenPhylDB. It is interesting to note that the four histidine residues required for the catalytic iron activity, were maintained in both alignments. Differences in tree topology (e.g. position of date palm sequences and Os04g04230.1) could also be due to deficiencies in the sequence, assembly or annotation of other sequenced plant genomes (e.g. sequencing quality, annotation quality, gene fragment, pseudogenes).

At the intra-specific phylogeny level, some topologies were also different. The gene GSMUA\_Achr5G02570\_001-GSMUA\_Achr4G31460\_001 pair was predicted in the Galaxy gene tree but not in GreenPhylDB. Finally, a nucleotide sequence phylogenetic analysis was done (in-house Galaxy GreenPhyl Phylogenomic analysis workflow (nucleic)) only for the cluster of the six *Musa* NCED genes where the topology differed between both analyses. The resulting gene tree confirmed the GSMUA\_Achr5G02570\_001 and GSMUA\_Achr4G31460\_001 gene pair and created a new pair (GSMUA\_Achr4G22870\_001 and GSMUA\_Achr7G01250\_001).



## 3.2. Musa paralogous region analysis

### 3.2.1. Matching ancestral blocks with an advanced search

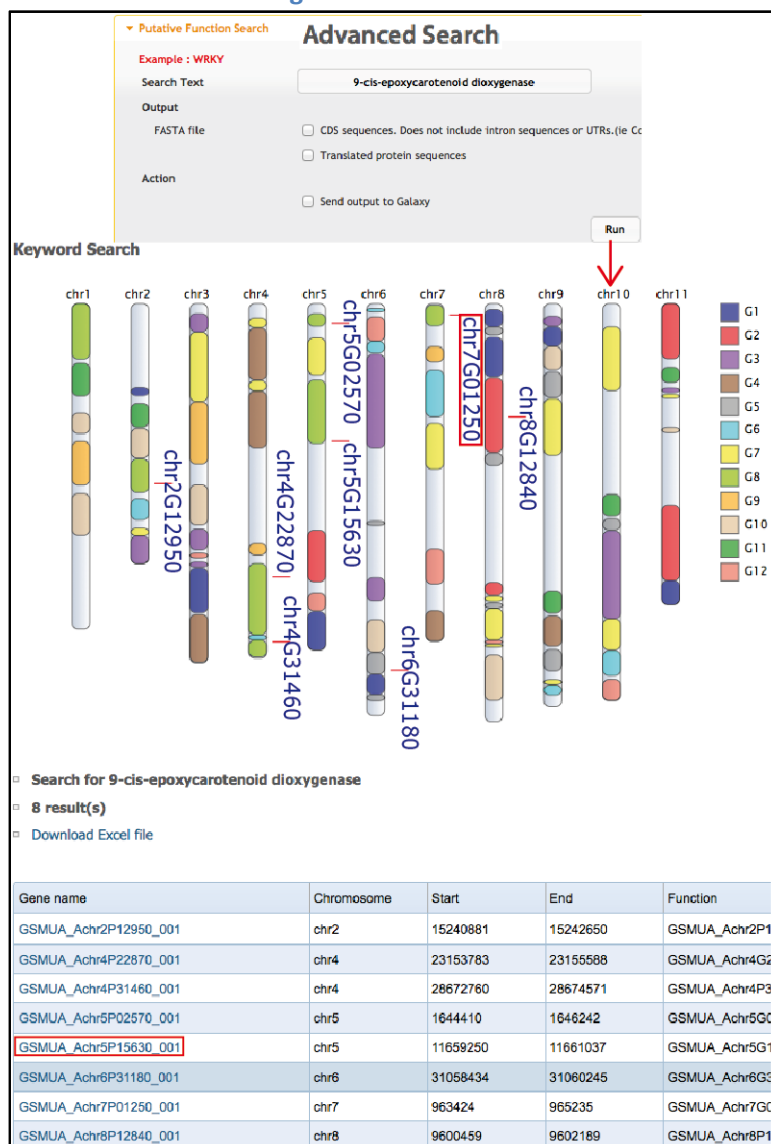

**Figure 10: Locate genes on ancestral blocks of *Musa* paralogous regions (Advanced Search).**

#### Method

Banana Genome Hub TOOLS “Advanced Search” allows querying features from attributes (e.g. select gene where product is ‘9-cis-epoxycarotenoid dioxygenase’) in the Bio::DB::SeqFeature::Store MySQL database.

<http://banana-genome.cirad.fr/advanced>

The resulting features are mapped onto a chromosome drawing where the chromosome are colored according to *Musa* beta ancestral blocks. This allows quickly checking if paralogs come from tandem duplication or ancestral WGD. The height DH-Pahang *Musa* NCED genes seem to come from ancestral duplication.

#### Results

To better understand the evolutionary history of the six *Musa* NCED genes, we investigated the origin and date of the duplications. So, we looked carefully at the paralogous *Musa* region dotplot, the synonymous substitution rate (Ks) and the gene context. The *Musa* beta ancestral block 8 shown on the *Musa* paralogous region karyotype is found duplicated on the *Musa* chromosomes 2, 4, 5 and 7 containing five out of the six NCED genes.

### 3.2.1. Using ancestral blocks on a dotplot

**Figure 11 Dot plot *Musa* beta ancestral blocks (PGDD).**

#### Method

The Syntenic Dotplot link in the Banana Genome Hub TOOLS menu corresponds to the Plant Genome Duplication Database system also allows viewing the synteny results but at a lower scale. <http://banana-genome.cirad.fr/dotplot>

It allows to clarify the number of block fragment and their location on the chromosomes. Finally, PGDD give access to the list of genes in the syntenic region.

#### Results

The same ancestral blocks were viewed as macrosynteny in the PGDD DotPlots. It helped to precisely link the relationships between current genes and ancestral blocks. The two pairs of NCED paralogs, (GSMUA\_Achr2GP12950\_001 and GSMUA\_Achr7G01250\_001) and (GSMUA\_Achr7G01250\_001, GSMUA\_Achr4G22870\_001) were found in syntenic position and resulted from whole genome duplications of beta ancestral blocks. Thus we can say that they are ancient homeologous gene pairs. The last gene of the six *Musa* NCED gene cluster, GSMUA\_Achr6G31180\_001, belongs to the ancestral block 5 and has the lowest Ks computed with GSMUA\_Achr4G31460\_001 suggests Zingiberales gamma WGD. Indeed, although the *Musa* NCED Ks are those of gene pairs and are not averages, they are coherent with the nucleotide gene tree topology. Thus, we adjusted the location of the microsynteny region to be viewed in GBrowse.

### 3.2.2. Checking back NCED gene contexts on the genome browser

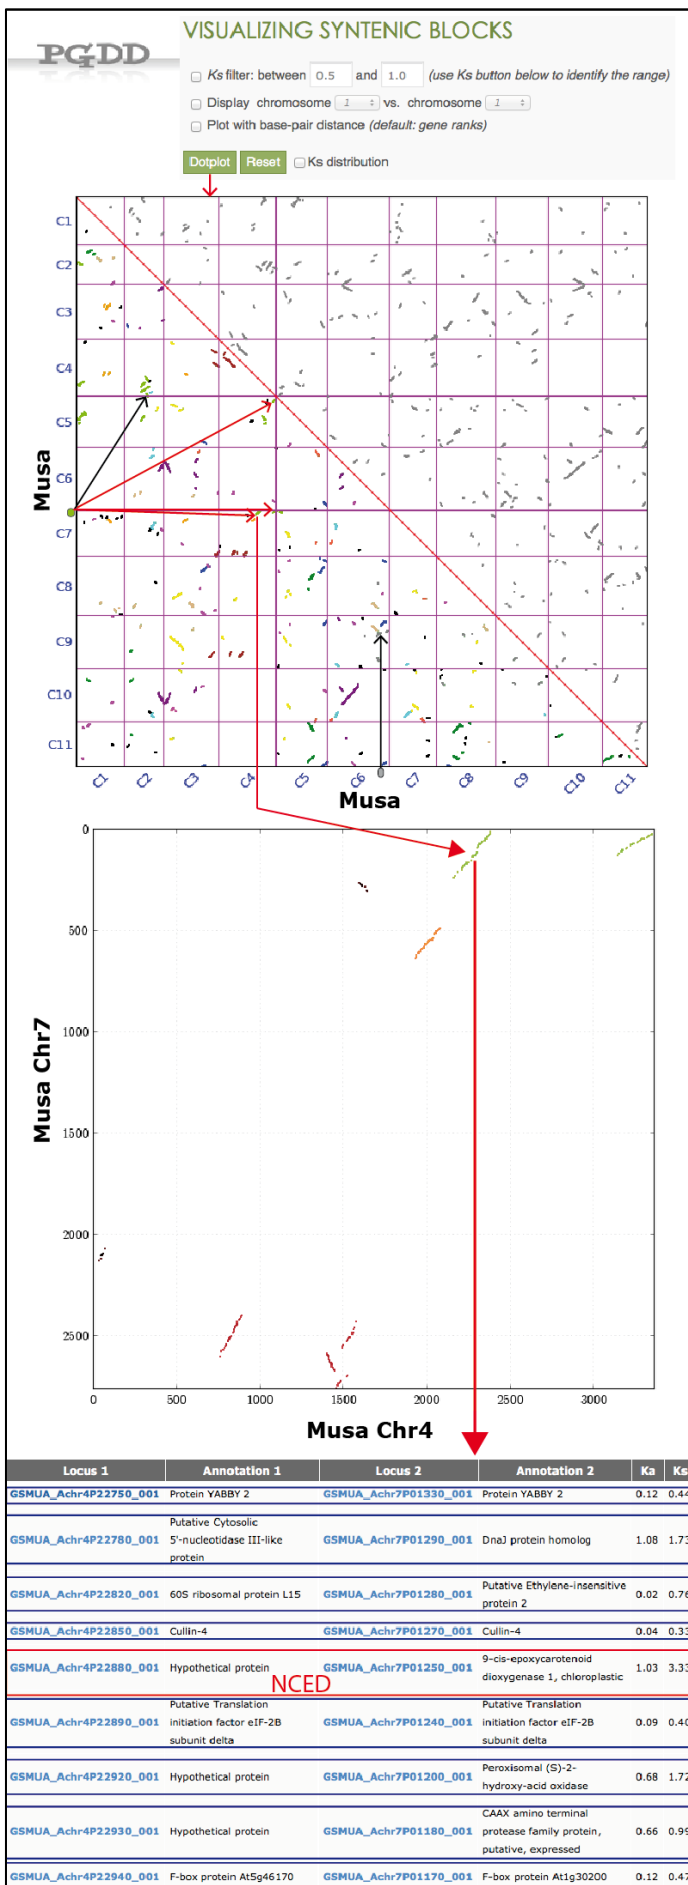





**Figure 12: Gene context of two *Musa* paralogous regions containing a NCED gene (GBrowse).**

#### Method

Go to the banana Genome Hub GBROWSE tab and search for the two paralogous region.

[http://banana-genome.cirad.fr/cgi-bin/gbrowse/musa\\_acuminata/?name=chr4:23040001..23190000](http://banana-genome.cirad.fr/cgi-bin/gbrowse/musa_acuminata/?name=chr4:23040001..23190000)

[http://banana-genome.cirad.fr/cgi-bin/gbrowse/musa\\_acuminata/?name=chr7:1040000..910001](http://banana-genome.cirad.fr/cgi-bin/gbrowse/musa_acuminata/?name=chr7:1040000..910001)

#### Results

At a lower scale, on the genome browser, we compared the genomic context of GSMUA\_Achr7G01250\_001 and GSMUA\_Achr4G22870\_001 we can guess a microsynteny region. Red boxes are for the NCED genes and blue boxes are for syntenic genes whose function is conserved between both paralogous regions. We noticed that the two regions are in opposite orientation.

### 3.2.3. SNP analysis

The SNIPlay interface displays the following information:

- SNP Queries:** 1 Accessions: reference; 2 Accessions: Pahang, PahangHD; 36539 Genes; 3 Genes: GSMUA\_Achr4G22820\_001, GSMUA\_Achr4G22830\_001, GSMUA\_Achr4G22850\_001.
- Filters:** Filter on localisation within gene: all; extend search around genes respecting distance: 0; Filter on position within consensus: Min 0, Max 10000; Filter on synonymous / non-synonymous: all; Filter on polymorphism type: Indel, Bi-allelic SNP, Tri-allelic SNP, Tetra-allelic SNP; Filter on indel size: Min 1, Max 500; Filter on minimal number of readable individuals: 1; Filter on frequency: Min 0, Max 50; Filter on SNP Illumina score: SNP scored, Min 0, Max 1; Filter on SNP type: all.
- Results:** 5 polymorphisms found (considering 3 genes and 2 accessions).
- SNP Table:**

| SNP name                              | Gene                  | Feature | Type | Majority | Minority | Frequency | Nb acc | Heterozygote | Homozygote |
|---------------------------------------|-----------------------|---------|------|----------|----------|-----------|--------|--------------|------------|
| chr4:23122302 <a href="#">GBrowse</a> | GSMUA_Achr4G22850_001 | exon    | A/G  | G        | A        | 25 %      | 2      | 1            | 1          |
| chr4:23115477 <a href="#">GBrowse</a> | GSMUA_Achr4G22830_001 | exon    | C/G  | G        | C        | 25 %      | 2      | 1            | 1          |
| chr4:23110605 <a href="#">GBrowse</a> | GSMUA_Achr4G22820_001 | exon    | A/G  | A        | G        | 25 %      | 2      | 1            | 1          |

**Figure 13: SNP analysis (SNIPlay).**

#### Method

Here, Illumina RNA-seq from DH-Pahang (homozygous) and Pahang (heterozygous) (same data than RNA-seq tracks in GBrowse 2, *i.e.* BLS control and inoculated; FOC TR4 non infected and infected) were mapped and analyzed on the DH-Pahang CDS. A link is made from GBrowse balloon URL using locus tag identifier but one can also query SNIPlay with a custom gene list from the SNP link in the Banana Genome Hub TOOLS menu.

<http://banana-genome.cirad.fr/sniplay>

#### Results

Querying SNIPlay, we observed no single nucleotide polymorphism (SNP) in GSMUA\_Achr4G22870\_001 in the studied conditions but we did in neighbor genes such as the GSMUA\_Achr4G22830\_001 coding sequence (GC polymorphism).

## 4. Query builder to export results

**Query Builder**

New Count Results URL XML Perl Help

Dataset: feature\_musa

Filters: Feature type : polypeptide, Function (% for wildcard) : %9-cis-epoxy%

Attributes: Gene Name, Gene Start, Strand, Function, Gene End, Chromosome, Length, Feature type, Sequence

Export all results to: File TSV Unique results only **Go**

Email notification to:

View: 10 rows as HTML Unique results only

| Gene Name             | Gene Start | Strand | Function                                           | Gene End | Chromosome | Length | Feature type |                                      |
|-----------------------|------------|--------|----------------------------------------------------|----------|------------|--------|--------------|--------------------------------------|
| GSMUA_Achr2P12950_001 | 15240881   | -1     | 9-cis-epoxycarotenoid dioxygenase 1, chloroplastic | 15242650 | chr2       | 590    | polypeptide  | MTSTAKPISKPLQCSTPLATQSVKLRNKTSSLTTL  |
| GSMUA_Achr5P02570_001 | 1644410    | 1      | 9-cis-epoxycarotenoid dioxygenase 1, chloroplastic | 1646242  | chr5       | 611    | polypeptide  | MTSPDVRSAAISPISKP HQFNALQRAQSIMLHRKQ |
| GSMUA_Achr6P31180_001 | 31058434   | -1     | 9-cis-epoxycarotenoid dioxygenase 1, chloroplastic | 31060245 | chr6       | 604    | polypeptide  | MLSAVCNVASSSSSVAVLGPSSRSRCIKITRKQSFT |
| GSMUA_Achr8P12840_001 | 9600459    | 1      | 9-cis-epoxycarotenoid dioxygenase 1, chloroplastic | 9602189  | chr8       | 577    | polypeptide  | MAQASLRVSPSLHFPHTESAPPQKPLVSPSRDLI   |
| GSMUA_Achr4P22870_001 | 23153783   | -1     | 9-cis-epoxycarotenoid dioxygenase 1, chloroplastic | 23155588 | chr4       | 602    | polypeptide  | MTTATSAMTSTVRSAAANPVKLIKHAAPATLRIRCS |
| GSMUA_Achr4P31460_001 | 28672760   | -1     | 9-cis-epoxycarotenoid dioxygenase 1, chloroplastic | 28674571 | chr4       | 604    | polypeptide  | MASATSCMNSHPPISNPQLRTLTVAKPIKLQSKQ   |
| GSMUA_Achr5P15630_001 | 11659250   | 1      | 9-cis-epoxycarotenoid dioxygenase 1, chloroplastic | 11661037 | chr5       | 596    | polypeptide  | MTQSCIRLSNIHVTATHPRKFRSTTGCRNFLSPSV  |
| GSMUA_Achr7P01250_001 | 963424     | 1      | 9-cis-epoxycarotenoid dioxygenase 1, chloroplastic | 965235   | chr7       | 604    | polypeptide  | MASATTAMTSTLQLPPNPVKLTRKQASATTTRVHC  |

**Figure 14 Build a query (Biomart).**

### Method

Biomart has its own database extracted from the Chado PostgreSQL database. It is accessible via the Query Builder link in the Banana Genome Hub TOOLS menu.

<http://banana-genome.cirad.fr/biomart>

### Results

The 8 NCED polypeptides can be easily exported all at once, in various formats (e.g. tabulated text, fasta), building a query with BioMart where the product (function) contains '9-cis-epoxy' for instance.
