# Supplementary material for: The Banana Genome Hub
Source: Oxford University Press journal article supplement (doi:10.1093/database/bat035), 2013-01-01
Supplement: bat035_Supplementary_Data.zip [file bat035_Supplementary_Data.zip]

## SUPPLEMENTARY TABLES

**Supplementary Table 1 : Banana Hub Systems hosted on the South Green Bioinformatics Platform**

| System             | Component            | Version | Language                                                             | Description                                                                            | References | URL                                                                                                                         |
|--------------------|----------------------|---------|----------------------------------------------------------------------|----------------------------------------------------------------------------------------|------------|-----------------------------------------------------------------------------------------------------------------------------|
| <b>Musa Hub</b>    | Tripal,<br>Gbrowse   | 2.4     | PHP                                                                  | Banana genome<br>reference                                                             |            | <a href="http://banana-genome.cirad.fr">http://banana-genome.cirad.fr</a>                                                   |
| <b>GNPAnnot</b>    | Chado                | 1.2     | PostgreSQL                                                           | Generic Model<br>Organism database<br>(GMOD)                                           | (1)        | <a href="http://www.gmod.org">http://www.gmod.org</a>                                                                       |
|                    | Chado<br>Controller  | 1.5     | PostgreSQL<br>Perl<br>Java                                           | Manage user access<br>rights on feature<br>Annotation inspector<br>Annotation history  | (2)        | <a href="http://www.gnpannot.org/content/chado-controller">http://www.gnpannot.org/content/chado-controller</a>             |
|                    | GBrowse              | 2.4     | Perl                                                                 | GMOD Genome<br>Browser                                                                 | (3)        | <a href="http://gnpannot.musagenomics.org/cgi-bin/gbrowse/musa/">http://gnpannot.musagenomics.org/cgi-bin/gbrowse/musa/</a> |
|                    | Artemis              | 13.2.8  | Java Web<br>Start                                                    | Genome Editor                                                                          | (4)        | <a href="http://www.sanger.ac.uk/resources/software/artemis/">http://www.sanger.ac.uk/resources/software/artemis/</a>       |
|                    | Tripal               |         | php                                                                  | Chado front end with<br>Drupal CMS                                                     | (5)        | <a href="http://tripal.sourceforge.net/">http://tripal.sourceforge.net/</a>                                                 |
|                    | Web Portal           |         | php                                                                  | Drupal CMS                                                                             | (6)        | <a href="http://www.gnpannot.org/">http://www.gnpannot.org/</a>                                                             |
|                    | GNPAnnot<br>pipeline |         | C, Perl                                                              | Protein coding gene<br>and repetitive<br>element prediction                            |            | n/a                                                                                                                         |
|                    | REPET<br>pipeline    |         | Python                                                               | Repetitive element<br>prediction                                                       |            | <a href="http://urgi.versailles.inra.fr/Tools/REPET">http://urgi.versailles.inra.fr/Tools/REPET</a>                         |
| <b>GreenPhyIDB</b> | Website              | 3.0     | Perl,<br>Javascript<br>(jquery,<br>Raphael)<br>Java applets<br>MySQL | Protein clusters<br>ing, curated gene<br>families, gene trees,<br>ortholog predictions | (7, 8)     | <a href="http://www.greenphylog.org/cgi-bin/index.cgi">http://www.greenphylog.org/cgi-bin/index.cgi</a>                     |
|                    | Pipeline             | 3.0     | Perl, java, C                                                        | Gene trees, homolog<br>predictions                                                     | (7, 8)     | n/a                                                                                                                         |
| <b>OryGenesDB</b>  | Website              |         | Perl, JQuery                                                         |                                                                                        | (9, 10)    | <a href="http://orygenesdb.cirad.fr/">http://orygenesdb.cirad.fr/</a>                                                       |
| <b>SNIPlay</b>     |                      |         |                                                                      | SNP predictions                                                                        | (11)       | <a href="http://sniplay.cirad.fr/cgi-bin/home.cgi">http://sniplay.cirad.fr/cgi-bin/home.cgi</a>                             |
| <b>ESTtik</b>      | Website              |         | Perl, MySQL                                                          | ESTs and RNA-seq                                                                       | (12)       | <a href="http://esttik.cirad.fr/">http://esttik.cirad.fr/</a>                                                               |

|                   | Pipeline |       | Perl, C |                                                       |          | <i>n/a</i>                                                                                                        |
|-------------------|----------|-------|---------|-------------------------------------------------------|----------|-------------------------------------------------------------------------------------------------------------------|
| <b>TropGENEDB</b> | Website  |       | Java    | Molecular markers, genetic maps and genetic resources | (13)     | <a href="http://tropgenedb.cirad.fr/tropgene/JSP/index.jsp">http://tropgenedb.cirad.fr/tropgene/JSP/index.jsp</a> |
| <b>Galaxy</b>     | Website  | 1.2.4 | Python  | Workflow manager                                      | (14, 15) | <a href="http://gohelle.cirad.fr/galaxy">http://gohelle.cirad.fr/galaxy</a>                                       |

**Supplementary Table 2 : Cellulose synthase and cellulose synthase-like gene numbers**

|                                        | <i>Arabidopsis thaliana</i> | <i>Vitis vinifera</i> | <i>Oryza sativa</i> | <i>Sorghum bicolor</i> | <i>Musa acuminata</i> |
|----------------------------------------|-----------------------------|-----------------------|---------------------|------------------------|-----------------------|
| Cellulose synthase ( <i>CesA</i> )     | 10                          | 11                    | 10                  | 10                     | <b>16</b>             |
| Cellulose synthase-like ( <i>Csl</i> ) |                             |                       |                     |                        |                       |
| <i>CslA</i>                            | 9                           | 4                     | 11                  | 8                      | <b>14</b>             |
| <i>CslB</i>                            | 6                           | 7                     | 0                   | 0                      | <b>0</b>              |
| <i>CslC</i>                            | 5                           | 5                     | 6                   | 5                      | <b>12</b>             |
| <i>CslD</i>                            | 6                           | 5                     | 5                   | 5                      | <b>9</b>              |
| <i>CslE</i>                            | 1                           | 9                     | 3                   | 3                      | <b>3</b>              |
| <i>CslF</i>                            | 0                           | 0                     | 8                   | 9                      | <b>0</b>              |
| <i>CslG</i>                            | 3                           | 15                    | 0                   | 0                      | <b>4</b>              |
| <i>CslH</i>                            | 0                           | 0                     | 3                   | 3                      | <b>1</b>              |
| <i>CslJ</i>                            | 0                           | 3                     | 0                   | 1                      | <b>0</b>              |

**Supplementary Table 3 : Summary of Musa CCD proteins identified by GreenPhylDB and analyzed through the banana hub.** Chloroplast peptides were predicted with TargetP (16).

| Locus tag                  | Family<br>(Greenphyl<br>ID) | Protein<br>length | Chloro<br>peptide | EST reads                                                                                                    | Genotyped SNP                      | Nearest<br>genetic<br>marker |
|----------------------------|-----------------------------|-------------------|-------------------|--------------------------------------------------------------------------------------------------------------|------------------------------------|------------------------------|
| GSMUA_Achr2<br>P09410_001  | GP074574<br>CCD8 type       | 567               | Yes               | AFFK454ReadsT00082726001<br>AFFK454ReadsT00082727001<br>AFFK454ReadsT00082728001<br>AFFK454ReadsT00082729001 |                                    | mMaCIR1160                   |
| GSMUA_Achr2<br>P12950_001  | GP069973<br>NCED            | 590               | Yes               | AFFM454ReadsT00070926001,<br>AFFM454ReadsT00070925001,<br>AFFM454ReadsT00070924001                           |                                    | mMaCIR1179                   |
| GSMUA_Achr3<br>P29770_001  | GP072303<br>CCD1 type       | 548               | No                | Around 50 EST reads                                                                                          |                                    | mMaCIR1387                   |
| GSMUA_Achr4<br>P19020_001  | GP069973<br>CCD4 type       | 527               | Yes               | 7 EST reads                                                                                                  |                                    | mMaCIR1045                   |
| GSMUA_Achr4<br>P22870_001  | GP069973<br>NCED            | 602               | Yes               | none                                                                                                         |                                    | mMaCIR1054                   |
| GSMUA_Achr4<br>P31460_001  | GP069973<br>NCED            | 604               | Yes               | AFFN454ReadsT00031438001<br>AFFN454ReadsT00031439001<br>AFFN454ReadsT00031437001<br>AFFN454ReadsT00031436001 |                                    | mMaCIR1405                   |
| GSMUA_Achr5<br>P02570_001  | GP069973<br>NCED            | 548               | Yes               | None                                                                                                         | BESCIRAD13770_5<br>BESCIRAD13770_3 | mMaCIR1072                   |
| GSMUA_Achr5<br>P15630_001  | GP069973<br>NCED            | 596               | Yes               | AFFK454ReadsT00054272001                                                                                     |                                    | mMaCIR1588                   |
| GSMUA_Achr6<br>P26310_001  | GP074574<br>CCD8 type       | 557               | Yes               | none                                                                                                         |                                    | mMaCIR1470                   |
| GSMUA_Achr6<br>P31180_001  | GP069973<br>NCED            | 604               | Yes               | AFFI454ReadsT00005131001                                                                                     |                                    | mMaCIR0352                   |
| GSMUA_Achr7<br>P01250_001  | GP069973<br>NCED            | 604               | Yes               | none                                                                                                         |                                    | mMaCIR1230                   |
| GSMUA_Achr8<br>P12840_001  | GP069973<br>NCED            | 576               | Yes               | none                                                                                                         |                                    | mMaCIR2313                   |
| GSMUA_Achr1<br>1P21000_001 | GP003862<br>CCD7 type       | 615               | Yes               | none                                                                                                         |                                    | mMaCIR1092                   |

**Supplementary Table 4 : Summary of Musa SPS proteins identified by GreenPhylDB and analyzed through the banana hub.** Chloroplast peptides were predicted with TargetP (16).

| Locus tag                 | Family<br>(Greenphyl ID)  | Protein<br>length | Chloro<br>peptide | EST reads                                                                                                                                                            | Genotyped SNP                                                                                                                  | Nearest<br>genetic<br>marker |
|---------------------------|---------------------------|-------------------|-------------------|----------------------------------------------------------------------------------------------------------------------------------------------------------------------|--------------------------------------------------------------------------------------------------------------------------------|------------------------------|
| GSMUA_Achr9<br>P22510_001 | GP016032<br>SPS Subfamily | 1062              | No                | More than 50                                                                                                                                                         | GAPR00017878001<br>GAPR00017879001<br>GAPR00017880001<br>GAPR00017881001<br>BESCNS1573_5<br>GAPR00017882001<br>GAPR00004504001 | mMeCIR525<br>mMaCI1634       |
| GSMUA_Achr4<br>P06050_001 | GP016032<br>SPS Subfamily | 1060              | No                | AFFI454ReadsT00060836001<br>AFFH454ReadsT00110683001<br>AFFH454ReadsT00110682001<br>AFFI454ReadsT00060837001<br>AFFL454ReadsT00055556001<br>AFFI454ReadsT00060838001 | 1                                                                                                                              | mMaCIR1326<br>mMaCIR1122     |
| GSMUA_Achr4<br>P16070_001 | GP016032<br>SPS Subfamily | 1083              | No                | More than 30                                                                                                                                                         | BESCNS4059_5<br>And 3 others                                                                                                   | mMaCIR1745<br>mMaCIR1191     |
| GSMUA_Achr6<br>P17480_001 | GP016032<br>SPS Subfamily | 1044              | No                | AFFI454ReadsT00000065001<br>AFFI454ReadsT00000066001<br>AFFN454ReadsT00000024001<br>AFFL454ReadsT00000034001                                                         |                                                                                                                                | mMaCIR1653<br>mMaCIR1131     |

## References

1. Mungall, C. J., and Emmert, D. B. (2007) A Chado case study: an ontology-based modular schema for representing genome-associated biological information, *Bioinformatics* 23, i337-346.
2. Guignon, V., Droc, G., Alaux, M., Baurens, F. C., Garsmeur, O., Poirion, C., Carver, T., Rouard, M., and Bocs, S. (2012) Chado Controller: advanced annotation management with a community annotation system, *Bioinformatics*.
3. Stein, L. D., Mungall, C., Shu, S., Caudy, M., Mangone, M., Day, A., Nickerson, E., Stajich, J. E., Harris, T. W., Arva, A., and Lewis, S. (2002) The generic genome browser: a building block for a model organism system database, *Genome Res* 12, 1599-1610.
4. Carver, T., Berriman, M., Tivey, A., Patel, C., Bohme, U., Barrell, B. G., Parkhill, J., and Rajandream, M. A. (2008) Artemis and ACT: viewing, annotating and comparing sequences stored in a relational database, *Bioinformatics* 24, 2672-2676.
5. Ficklin, S. P., Sanderson, L. A., Cheng, C. H., Staton, M. E., Lee, T., Cho, I. H., Jung, S., Bett, K. E., and Main, D. (2011) Tripal: a construction toolkit for online genome databases, *Database (Oxford)* 2011, bar044.
6. Guignon, V., Droc, G., and Bocs, S. (2008-2011) GNPAnnot portal <http://www.gnpannot.org>.
7. Conte, M., Gaillard, S., Lanau, N., Rouard, M., and Perin, C. (2008) GreenPhylDB: a database for plant comparative genomics, *Nucleic acids research* 36, D991-D998.
8. Rouard, M., Guignon, V., Aluome, C., Laporte, M. A., Droc, G., Walde, C., Zmasek, C. M., Périn, C., and Conte, M. G. (2011) GreenPhylDB v2. 0: comparative and functional genomics in plants, *Nucleic acids research* 39, D1095-D1102.
9. Droc, G., Périn, C., Fromentin, S., and Larmande, P. (2009) OryGenesDB 2008 update: database interoperability for functional genomics of rice, *Nucleic acids research* 37, D992-D995.
10. Droc, G., Ruiz, M., Larmande, P., Pereira, A., Piffanelli, P., Morel, J., Dievart, A., Courtois, B., Guiderdoni, E., and Perin, C. (2006) OryGenesDB: a database for rice reverse genetics, *Nucleic acids research* 34, D736-D740.
11. Dereeper, A., Nicolas, S., Le Cunff, L., Bacilieri, R., Doligez, A., Peros, J. P., Ruiz, M., and This, P. (2011) SNIPlay: a web-based tool for detection, management and analysis of SNPs. Application to grapevine diversity projects, *BMC bioinformatics* 12, 134.
12. Argout, X., Ruiz, M., Fouet, O., Lanaud, C., Wincker, P., Da Silva, C., and Courtois, B. ESTtik, a semi-automatic cDNA sequence analysis and annotation pipeline including SSR and SNP search tools.
13. Ruiz, M., Rouard, M., Raboin, L. M., Lartaud, M., Lagoda, P., and Courtois, B. (2004) TropGENE-DB, a multi-tropical crop information system, *Nucleic acids research* 32, D364-D367.
14. Afgan, E., Ananda, G., Baker, D., Blankenberg, D., Bouvier, D., Clements, D., Coraor, N., Goecks, J., Hillman Jackson, J., von Kuster, G., Lazarus, R., Nekrutenko, A., and Taylor, J. (2012) Galaxy Bioinformatics workflow management systems <https://main.g2.bx.psu.edu/>, Galaxy is funded by National Science Foundation, Eberly College of Science, and Huck Institutes for the Life Sciences.

15. Vincent Maillol, R. B., Stéphanie Sidibe Bocs, Jean-Michel Boursiquot, Grégory Carrier, Alexis Dereeper, Gaétan Droc, Cécile Fleury, Pierre Larmande, Loïc Lecunff, Jean-Pierre Péros, Bertrand Pitollat, Manuel Ruiz, Gautier Sarah, Guilhem Sempéré, Marilyne Summo, Patrice This, and Jean-Francois Dufayard. (2012) Role of Galaxy in a bioinformatic plant breeding platform, In *Galaxy Community Conference*.
16. Emanuelsson, O., Nielsen, H., Brunak, S., and von Heijne, G. (2000) Predicting subcellular localization of proteins based on their N-terminal amino acid sequence, *Journal of molecular biology* 300, 1005-1016.
