# Supplementary material for: The Banana Genome Hub
Source: Database (Oxford). 2013 May 23;2013:bat035. doi: 10.1093/database/bat035 (PMC3662865; doi:10.1093/database/bat035)
Supplement: Supplementary Data [file supp_bat035_suppl_data.zip]

Archive with 4 entries (4 files):
- Supplementary File 3.pdf
- Supplementary Tables.pdf
- Supplementary File 1.pdf
- Supplementary File 2.pdf
